# Supplementary material for: FeSe2nanocrystalline aggregated microspheres with ultrahigh pseudocapacitive contribution for enhanced sodium-ion storage
Source: Royal Society of Chemistry journal article supplement (doi:10.1039/d3ce00409k), 2023-01-01
Supplement: d3ce00409k1.pdf [file d3ce00409k1.pdf]

**FeSe<sub>2</sub> nanocrystalline aggregated microsphere with  
ultrahigh pseudocapacitive contribution for enhanced  
sodium-ion storage**

Peiyuan Wang,<sup>\*a,b</sup> Yihang Hou,<sup>b</sup> Gencheng Deng,<sup>b</sup> Zhuofan Liu,<sup>b</sup> Yonghao Li,<sup>b</sup>  
Denggui Zhu,<sup>b</sup> Dongjie Guo,<sup>b</sup> and Shumin Sun<sup>\*b</sup>

<sup>a</sup> *Henan Provincial Key Laboratory of Surface and Interface Science, Zhengzhou University of Light Industry, Zhengzhou 450001, P. R. China. E-mail: peiyuanwang@zzuli.edu.cn.*

<sup>b</sup> *Department of Materials and Chemical Engineering, Zhengzhou University of Light Industry, Zhengzhou 450001, P. R. China. E-mail: smsun@zzuli.edu.cn.*

## **Material characterization**

The morphologies and microstructure of as-synthesized samples were observed by using field emission scanning electron microscopy (FESEM, JSM-7001F, 10 kV), transmission electron microscopy (TEM, JEM-2100 operated at 200 kV) and energy dispersive spectroscopy (EDS, JEM-ARM200F). Crystalline structures of materials were characterized in the range of 10-80° (2 $\theta$ ) through German Bruker D8 Advance X-ray diffractometer (XRD) using Cu K $\alpha$  ( $\lambda=1.54056$  Å) radiation. The chemical compositions and elemental valence of synthesized samples were investigated by the X-ray photoelectron spectrometer (XPS, Thermo Fisher Scientific, USA).

## **Electrochemical measurements**

The electrochemical properties of the obtained FeSe<sub>2</sub>@NC materials were tested by assembling CR2032 coin cells in an Ar-filled glovebox using FeSe<sub>2</sub>@NC as the working electrode, sodium metal as the counter electrode, 1.0 M NaClO<sub>4</sub> dissolved in a mixture of EC, DMC and EMC (1:1:1, vol.%) with 2 vol.% FEC as electrolyte, and Whatman glass fiber as separator. The working electrodes were fabricated as follows: first, the obtained FeSe<sub>2</sub>@NC materials were mixed with Ketjen black (as conductive agent), and poly (vinylidene fluoride) (PVDF, as binder) in a mass ratio of 7:2:1, the mixture was dispersed in N-methyl-2-pyrrolidone (NMP) to form homogeneous slurry, and then the resulting slurry was uniformly coated on aluminum foil and dried at 120 °C for 12 h in a vacuum oven. Finally, the FeSe<sub>2</sub>@NC coated Al foils were punched into 14 mm disks to obtain the working electrodes. The loading mass of active material was about 1 mg. The electrochemical measurements, including constant current charge-discharge testing, cyclic voltammetry (CV) and electrochemical impedance spectroscopy (EIS) were performed using Land battery testing system (CT4008TNn-5V10mA-164, China) and an electrochemical workstation (CHI660E, China), respectively. The cells were galvanostatically charged and discharged between 0.5 and 3.0 V at various current densities. The capacity was calculated according to the mass of the active material in the electrode, excluding the mass of conductive carbon and binder.

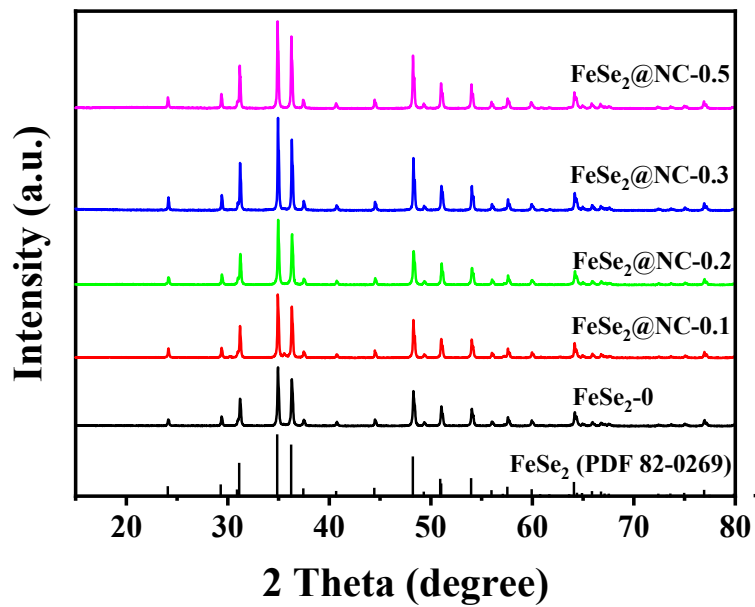

Fig S1. XRD patterns of FeSe<sub>2</sub>-0, FeSe<sub>2</sub>@NC-0.1, FeSe<sub>2</sub>@NC-0.2, FeSe<sub>2</sub>@NC-0.3 and FeSe<sub>2</sub>@NC-0.5

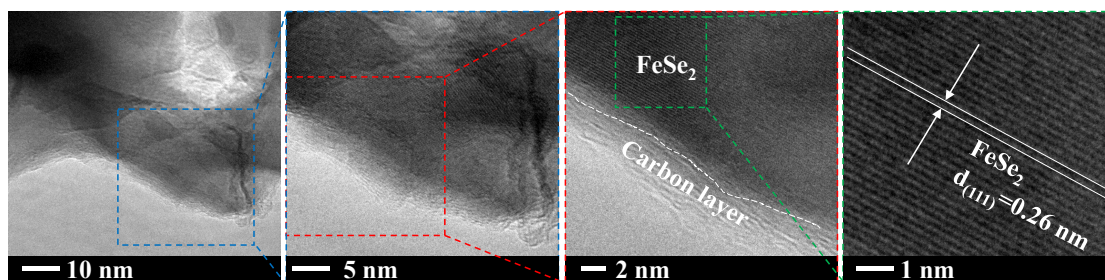

Fig. S2 TEM images of FeSe<sub>2</sub>@NC-0.3

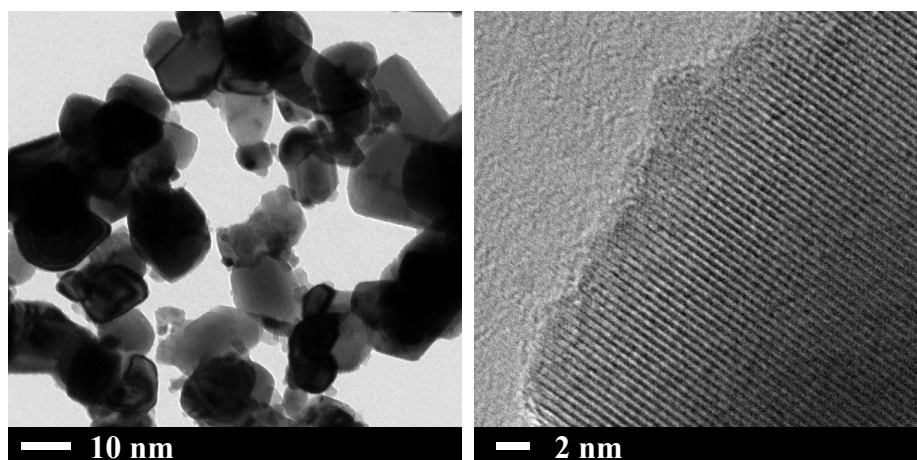

Fig S3. TEM images of FeSe<sub>2</sub>-0

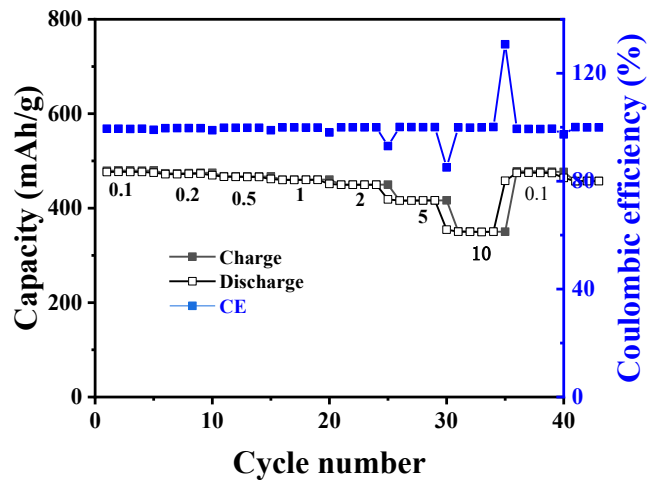

Fig S4. Rate capability of FeSe<sub>2</sub>-0

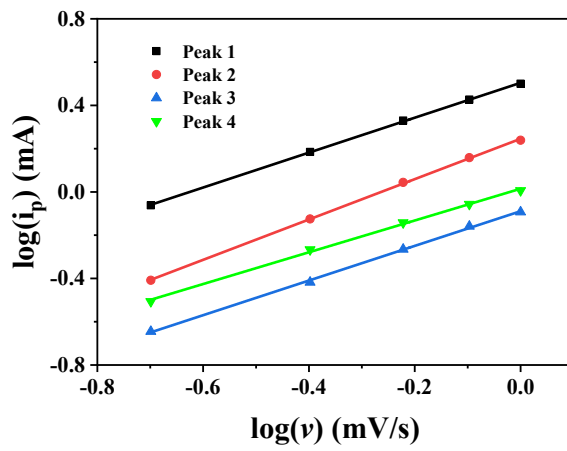

Fig. S5 Relation between  $\log i_{(\text{peak current})}$  and  $\log v_{(\text{scan rate})}$  of FeSe<sub>2</sub>@NC-0.3

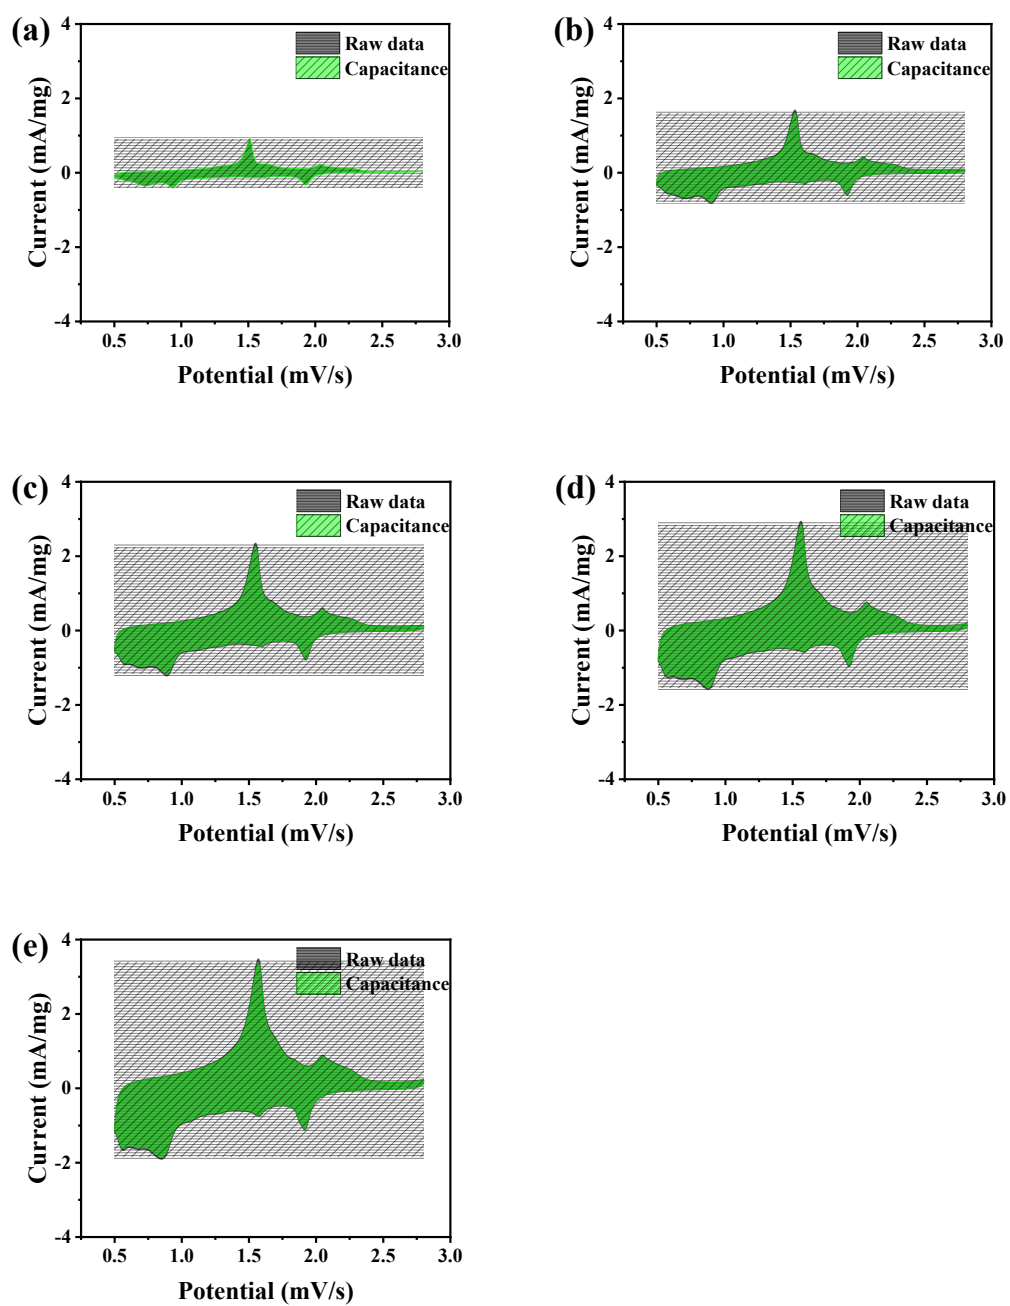

Fig. S6 The fitting diagrams of the normalized contribution rate of capacitance at different sweep rates for FeSe<sub>2</sub>@NS-0.3

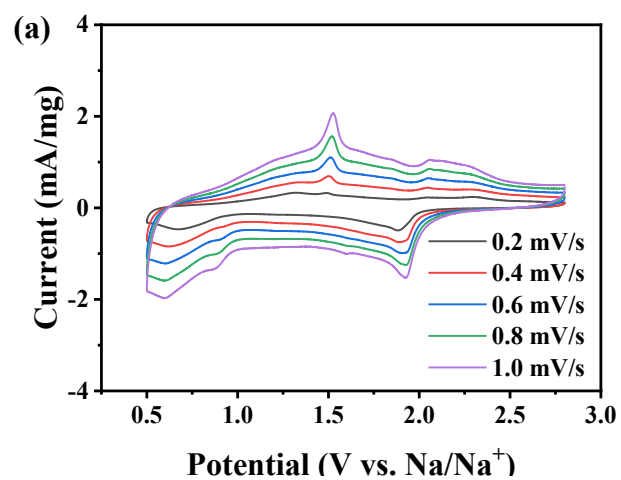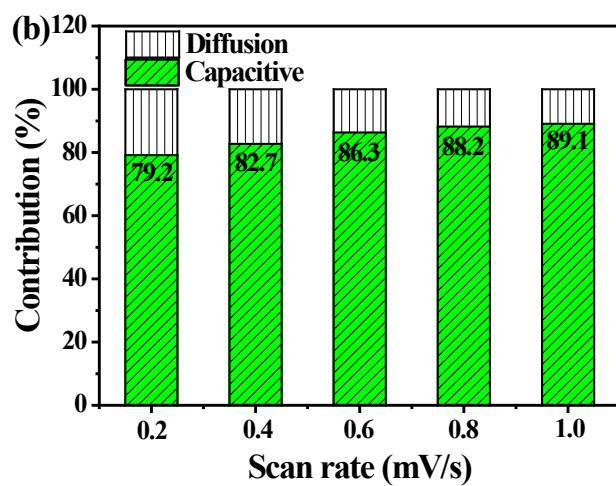

Fig. S7 CV curves of FeSe<sub>2</sub>-0 at various scan rates (a) and normalized contribution ratio of capacitive at different scan rates (b)

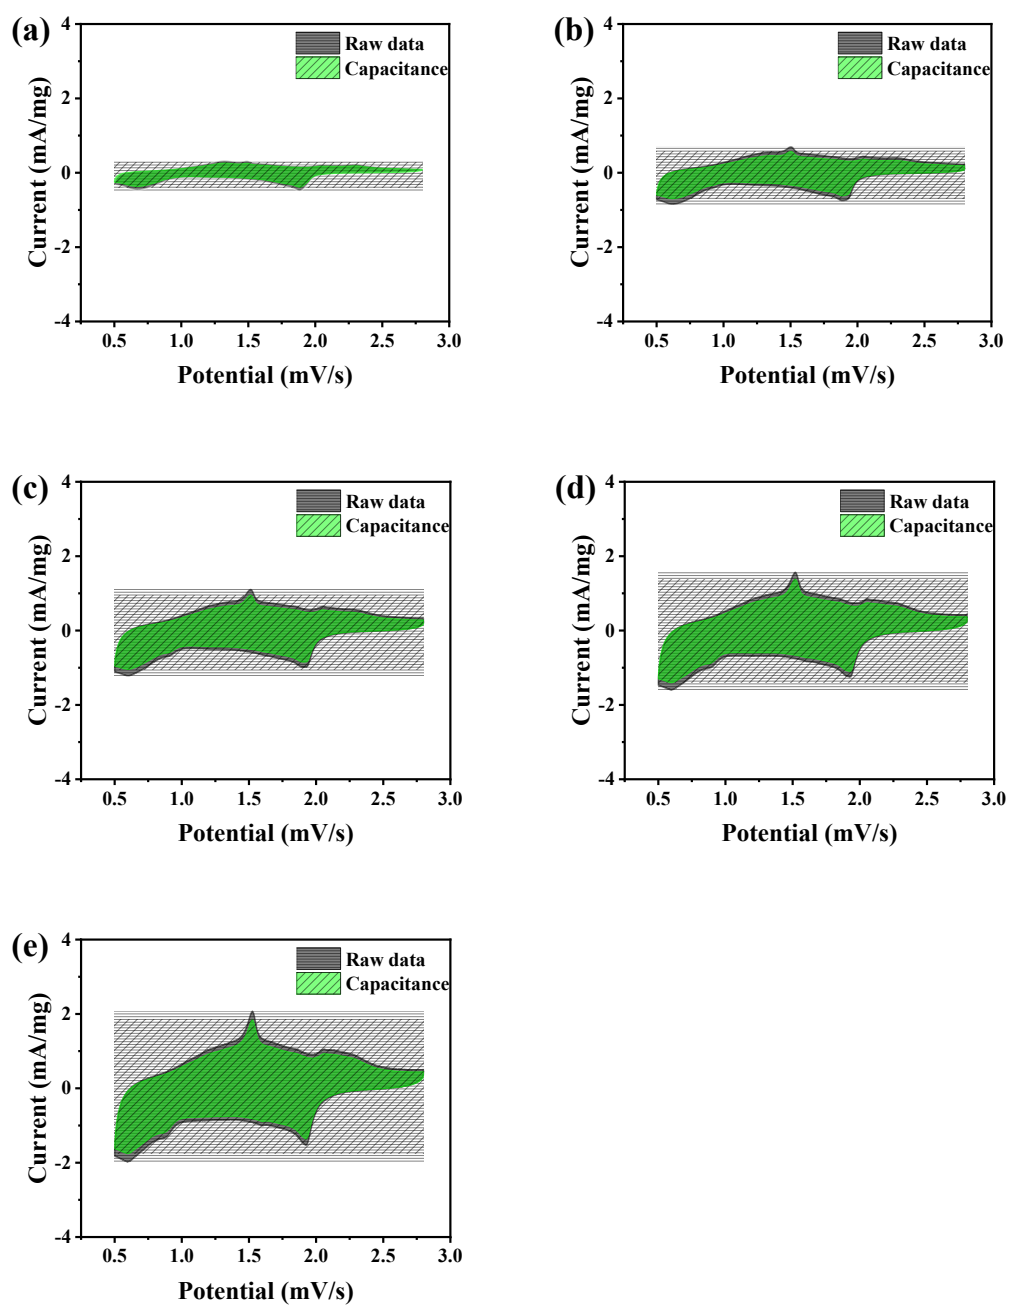

Fig. S8 The fitting diagrams of the normalized contribution rate of capacitance at different sweep rates for FeSe<sub>2</sub>-0

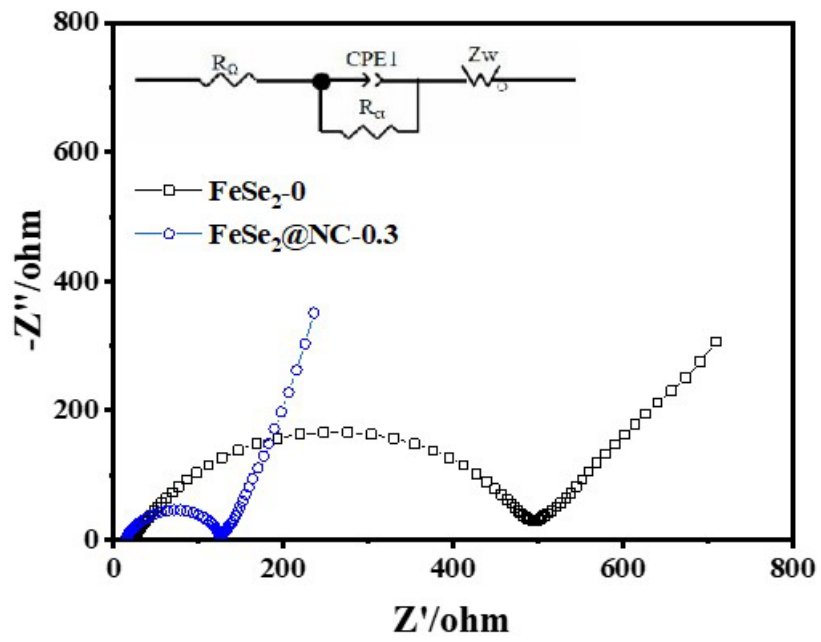

Fig. S9 Nyquist plots of FeSe<sub>2</sub>-0 and FeSe<sub>2</sub>@NC-0.3 electrodes
